# Supplementary material for: Regulation of Mitochondria-Associated Membranes (MAMs) by NO/sGC/PKG Participates in the Control of Hepatic Insulin Response
Source: Cells. 2019 Oct 25;8(11):1319. doi: 10.3390/cells8111319 (PMC6912364; doi:10.3390/cells8111319)

## Supplementary data

**Table S1: Forward and reverse primers used in quantitative PCR on Huh7 cells.**

| Common name | Official name        | Forward                              | Reverse                           |
|-------------|----------------------|--------------------------------------|-----------------------------------|
| GFP         | <i>Gfp</i>           | 5'-ACG TAA ACG GCC ACA AGT TC-3'     | 5'-AAG TCG TGC TGC TTC ATG TG-3'  |
| TBP         | <i>Tbp</i>           | 5'-AGA CCA TTG CAC TTC GTG CC-3'     | 5'-CCT GTG CAC ACC ATT TTC CC-3'  |
| COX-1       | <i>Cox-1</i>         | 5'-ACT ATA CTA CTA CTA ACA GAC CG-3' | 5'-GGT TCT TTT TTT CCG GAG TA -3' |
| PPIA        | <i>Cyclophilin A</i> | 5'-ACA CGC CAT AAT GGC ACT GG-3'     | 5'-CAG TCT TGG CAG TGC AGA T-3'   |

**Figure S1: eNOS is the main enzyme expressed and involved in NO synthesis in hepatocyte cells.**

(A-B) Representative western-blot of the impact of modulating NO concentration using L-Name (1mM), arginine (1mM) and NONOate (1mM) on eNOS and iNOS expression in non-inflammatory conditions (A) *in vivo* in the liver of C57Bl6/JOlash male mice and (B) *in vitro* in Huh7 cells (control and CypD KO using CRISPR-cas9). Liver homogenate from a high fat-fed mouse was used as a positive control for iNOS.

(C) Representative image of eNOS and iNOS immunofluorescence on Huh7 cells and HUVEK cells (Human Umbilical Vein Endothelial Cells). Each red dots on the image corresponding to the eNOS or iNOS antibody labelling of each protein respectively. Cells were incubated overnight at 4°C with primary antibodies (1/500 dilution, Mouse, NOS3 sc-376751 or NOS2 sc-7271). After several washes with TBS-Tween 0.05%, cells were incubated for 1h at 37°C with the complementary secondary antibody (Alexa Fluor® 555, A21424). Cells were washed three times again with TBS-Tween 0.05% and mounted with “DuolinkII mounting medium” containing DAPI.

**A**

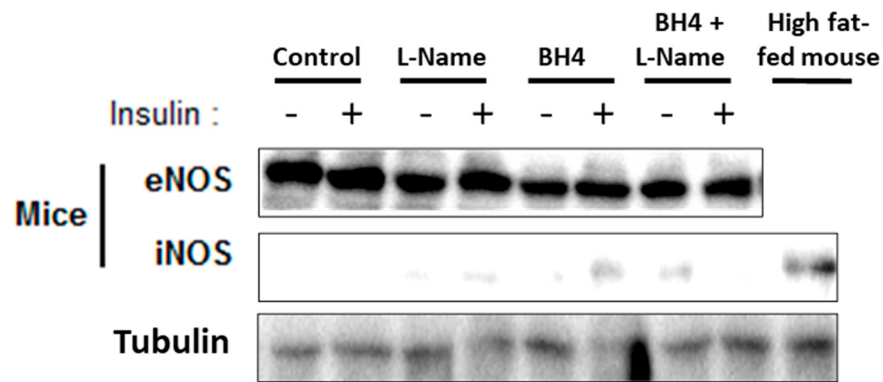

**B**

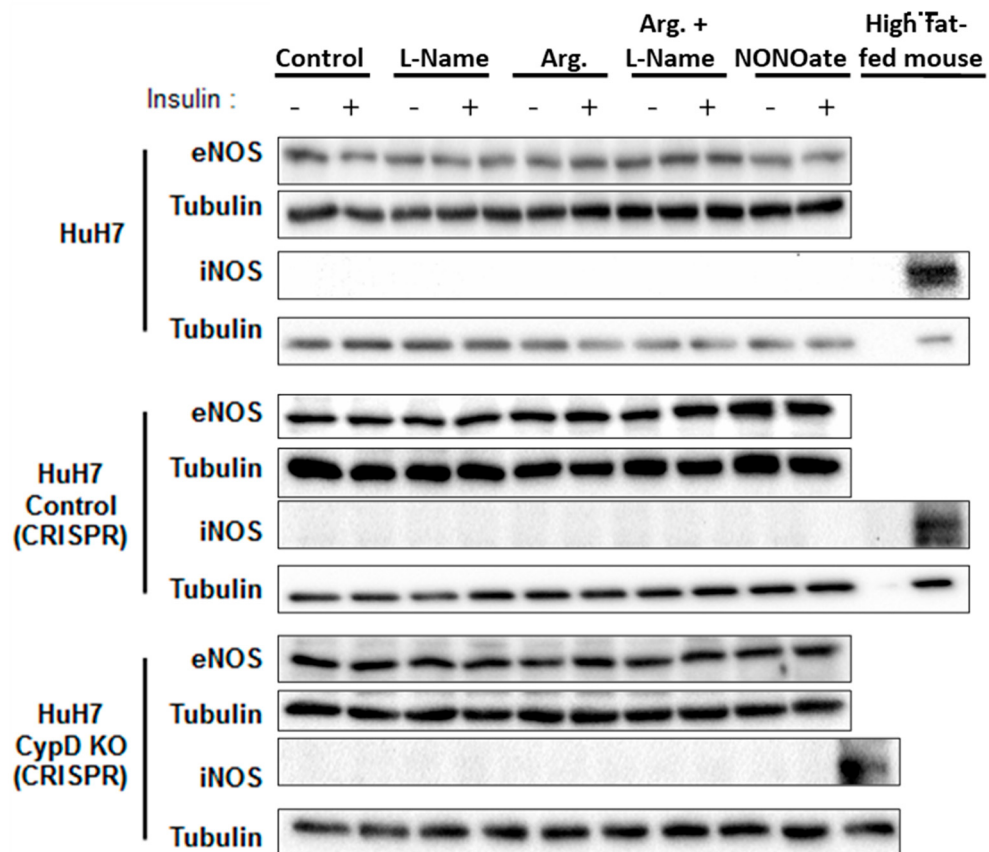

**C**

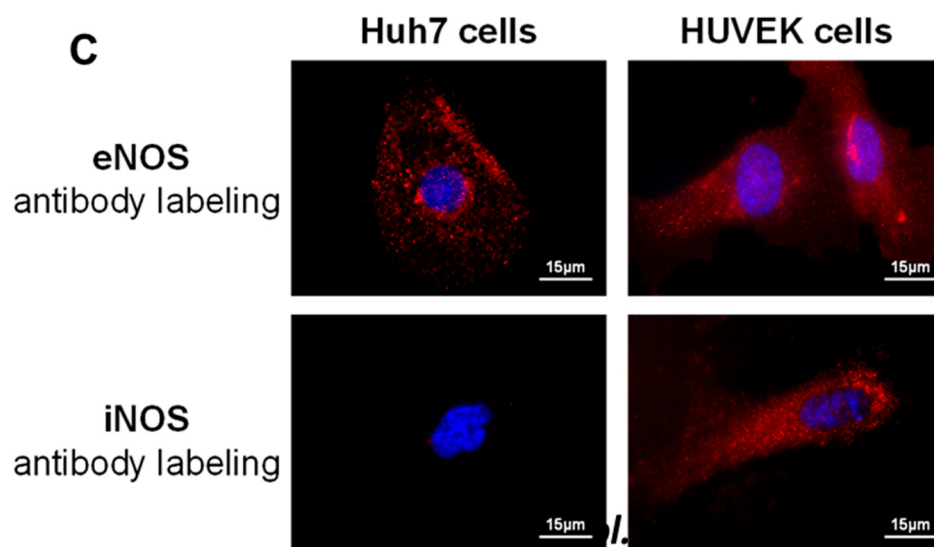

**Figure S2:**

(A) Purity of the fractions isolated from liver homogenates determined using immunoblotting for specific protein markers, i.e. aconitase for mitochondria, SIL-1 for ER, SERCA-2 for MAMs and VDAC1 for mitochondria and MAMs. C57Bl6/JOlash male mice received ip injection of BH4 (12.5mg/kg), L-Name (25mg/kg) and combination of the two, twice the day before and 2h before euthanasia. Representative western blots and commasie blue.

(B) Impact of modulating *in vivo* the NO production on protein content at the MAM fraction of key proteins involved in MAM formation, i.e. SERCA-2, mitofusin 2 (Mfn 2), glucose-regulated protein 75 (Grp75), cyclophilin D (CypD), VDAC1 and Optic atrophy type 1 (OPA1). Representative western blots, commasie blue and quantitative analyses ( $n = 5$  mice per condition).

**A**

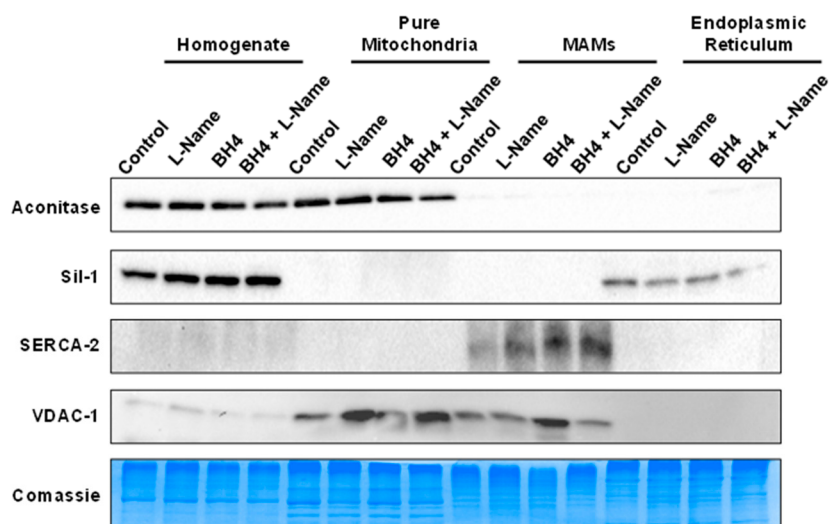

**B**

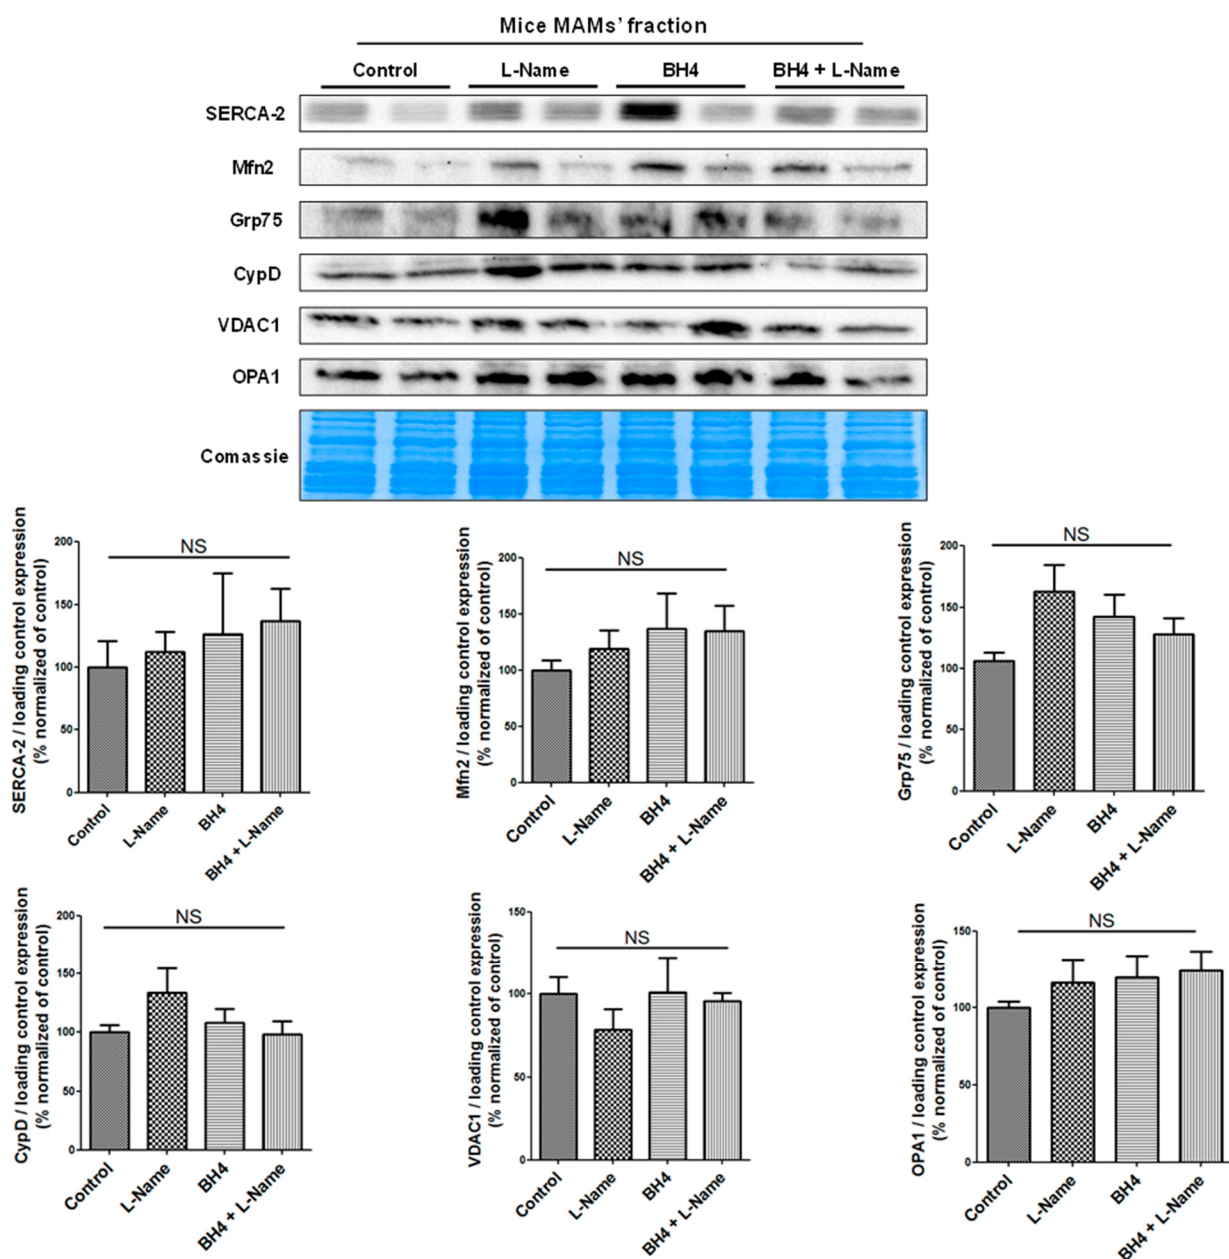

**Figure S3:**

(A) Impact of modulating *in vivo* the NO production on hepatic insulin signaling proteins located at MAMs. C57Bl6/JOlash male mice ( $n = 5$  mice per condition) received ip injection of BH4 (12.5mg/kg), L-Name (25mg/kg) and combination of the two, twice the day before and 2h before euthanasia. Representative western blots and quantitative analyses of total and phosphorylated Akt and GSK3 $\beta$  according to treatments.

(B-C) Impact of arginine 1mM addition (B) or depletion after 24h treatment (C) during 5 to 60 minutes on ER-mitochondria interactions assessed through VDAC1/IP3R1 interactions using *in situ* PLA ( $n = 10$  images minimum per experiment). In figure B, impact of 24h treatment with arginine 1mM is given as a reference. # and £,  $p < 0.05$  vs. control (figure B) and Arginine 1 mM for 24 hours (figure C), respectively.

**A**

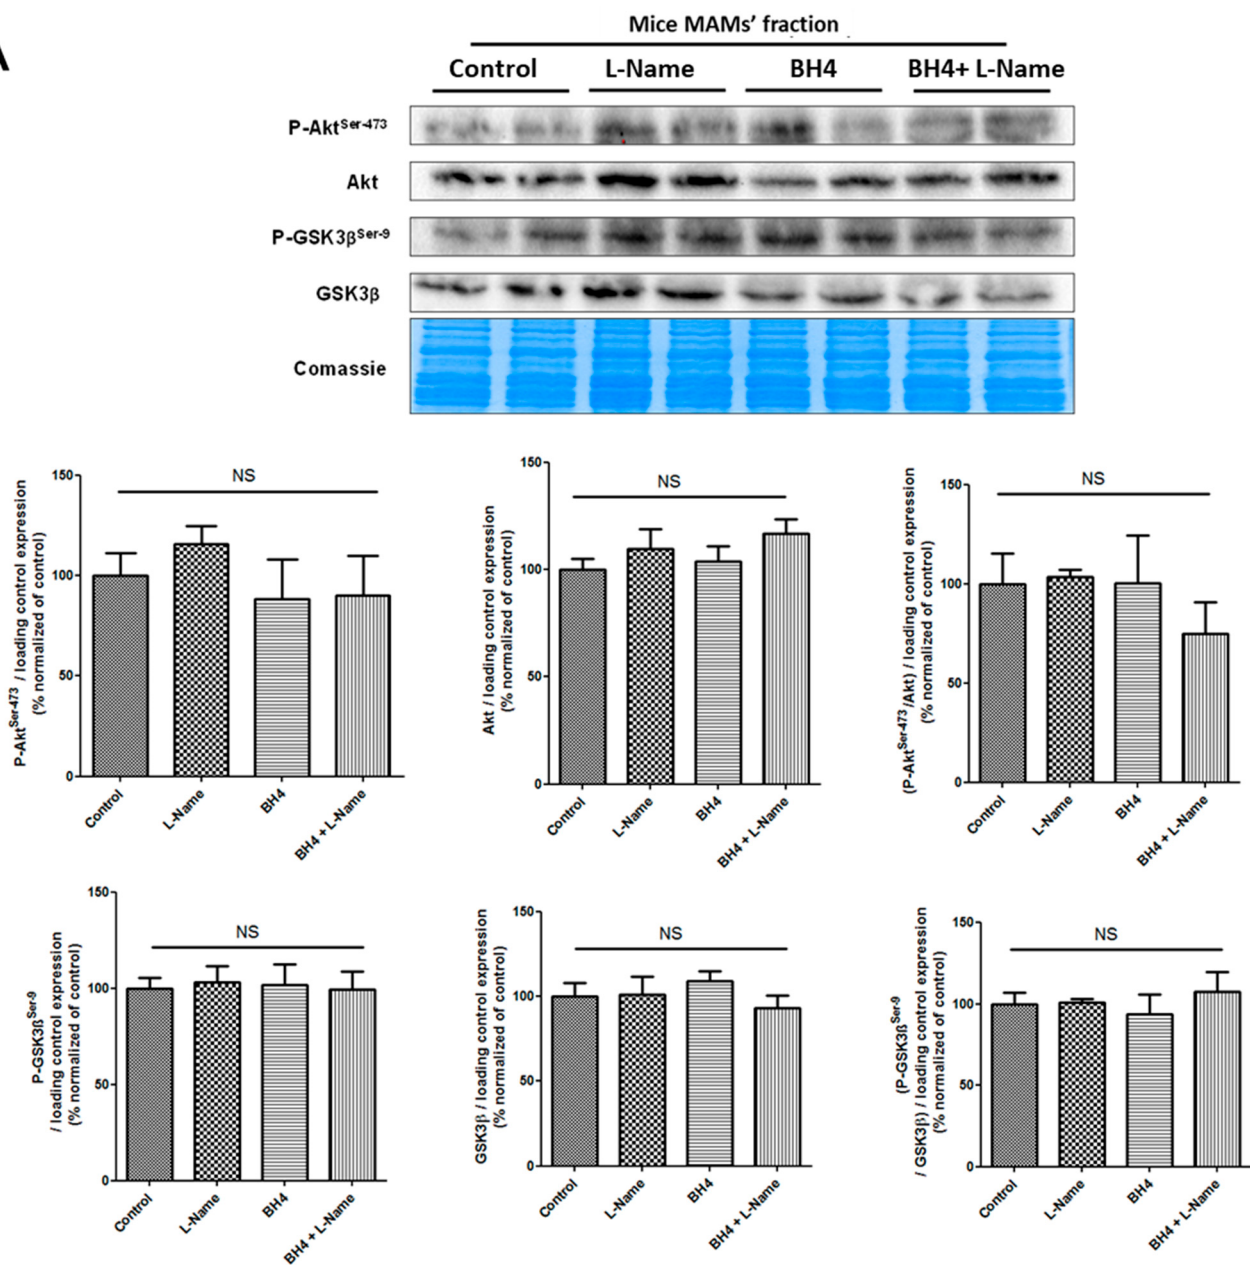

**B**

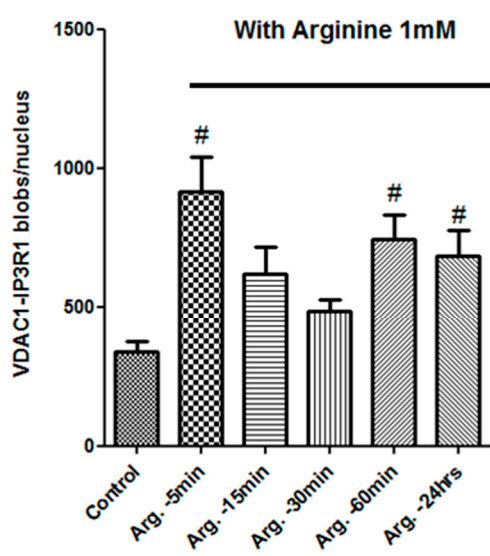

**C**

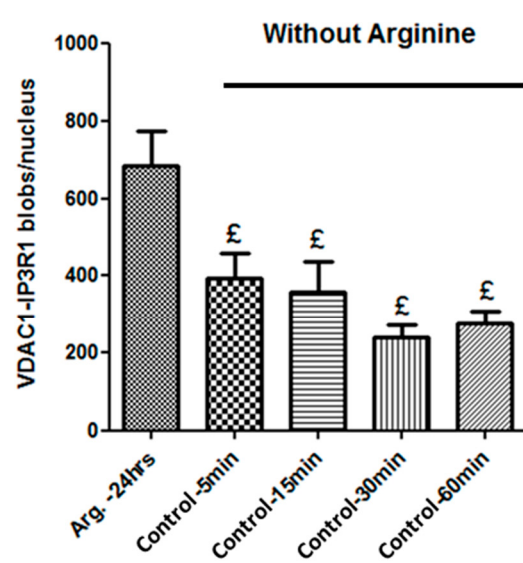

**Figure S4:**

(A) Representative Western blots of the impact of modulating NO production *in vitro* in Huh7 cells on protein content in VDAC1 and IP3R1.

(B) Cell viability in response to modulation of NO production assessed using Thoma cell counting chamber and automatic counting using the LUNA<sup>TM</sup> Automated Cell Counter (Logos Biosystems). Representative images are presented on the next page.

(C) Representative Western blots of the impact of modulating NO production *in vitro* in Huh7 cells on protein content of caspase 3, a marker of apoptosis.

(D) Representative Western blots of the impact of modulating NO production *in vitro* in Huh7 cells on protein content in markers of the endoplasmic reticulum stress.

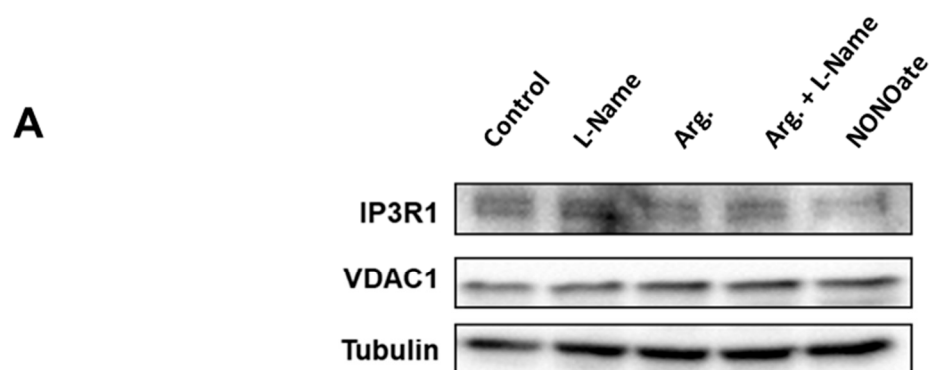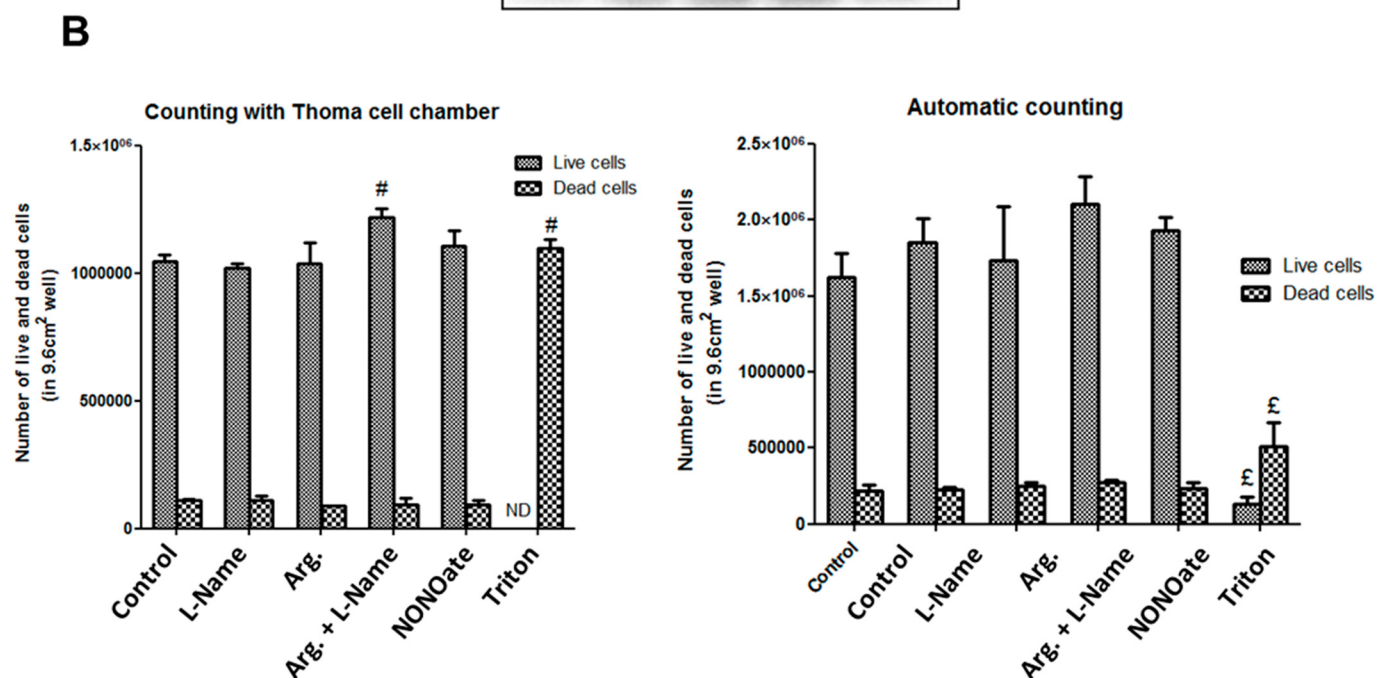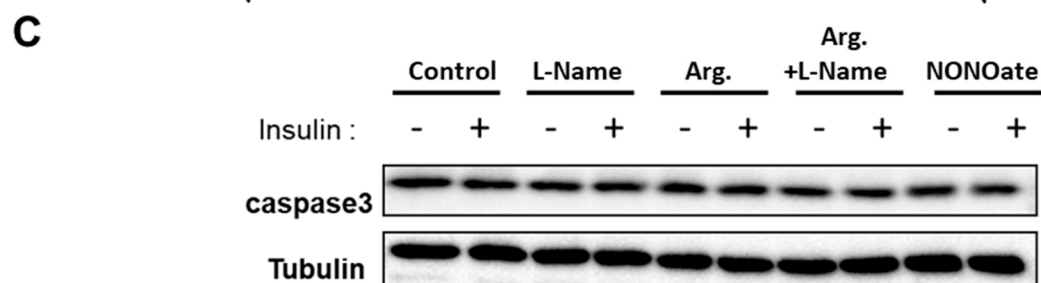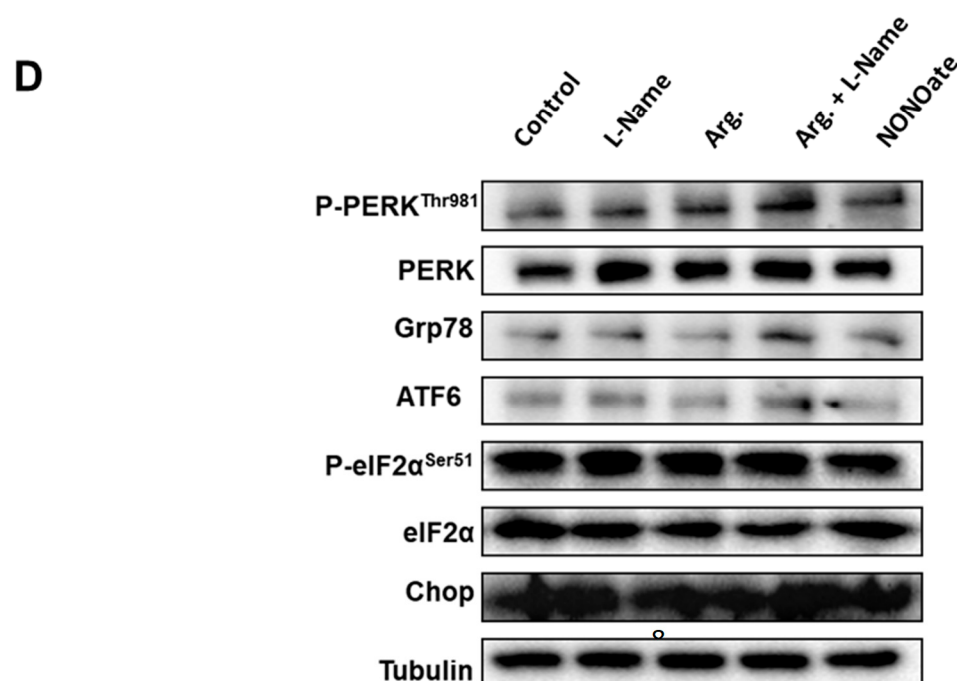

Huh7 before trypsin  
(in 9,6cm2 well)

Huh7 after trypsin  
and stain with blue  
trypan in Thoma  
chamber

Huh7 after trypsin  
and stain with blue  
trypan in Automatic  
Logos Biosystems

Control

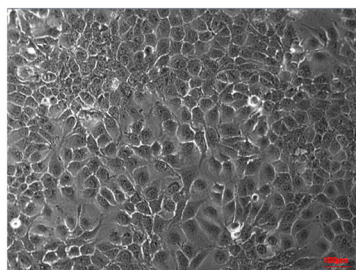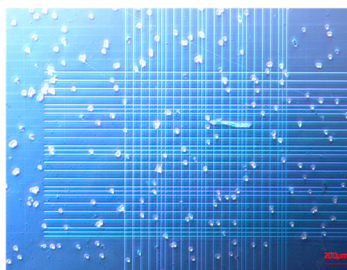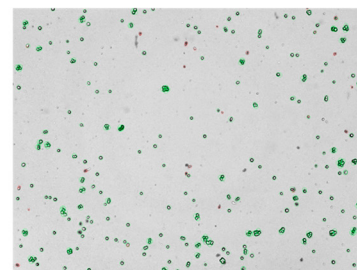

L-Name

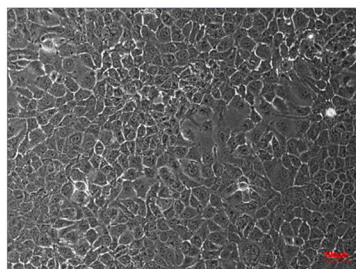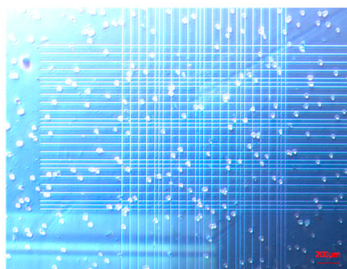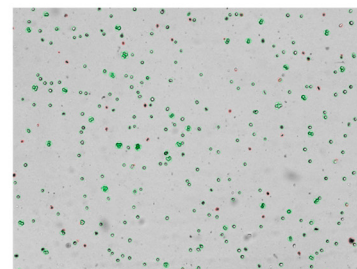

Arg.

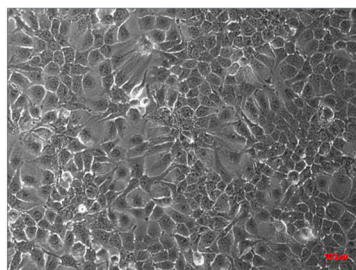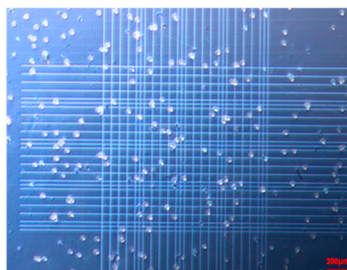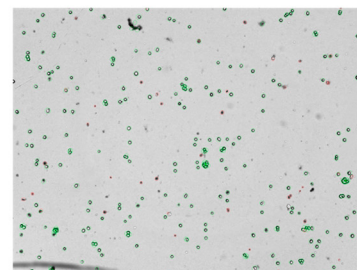

Arg. + L-Name

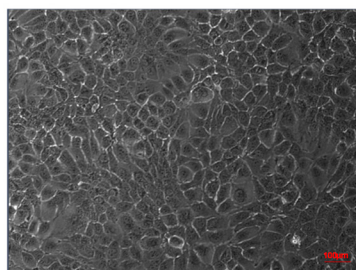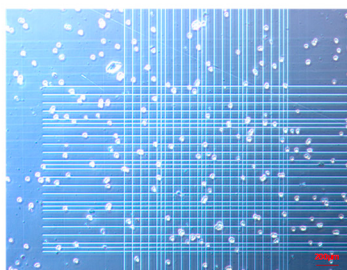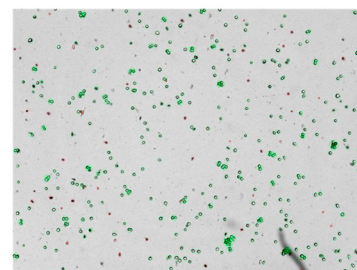

NONOate

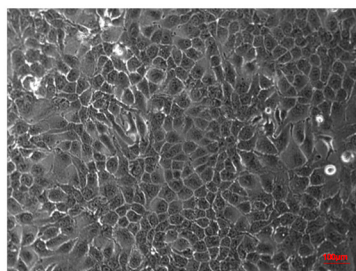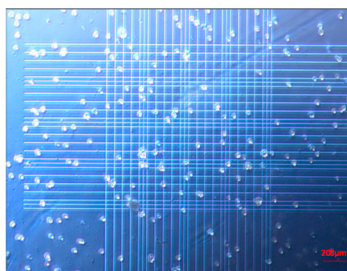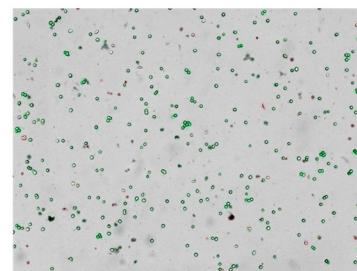

Control + Tryton

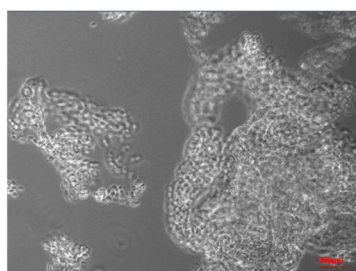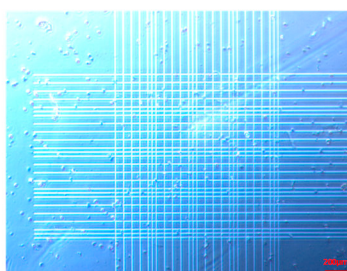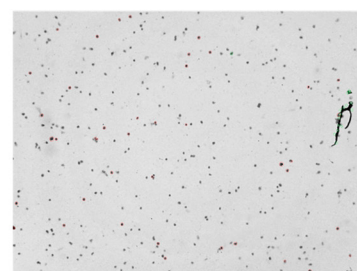

**Figure S5:**

(A) Impact of modulating *in vitro* NO production on whole cell oxygen consumption assessed using oxygraphy in primary rat hepatocytes ( $n$  = minimum 6 independent experiments). Oxygen consumption was monitored in intact primary rat hepatocytes in DMEM medium with glucose and treatments. Basal respiration was assessed at 37°C with treatments. Addition of 10µg/mL of oligomycin provided uncoupled (non-phosphorylating) oxygen consumption.

(B) Representative scheme of Wortmannin action on the molecular Akt signalization.

(C-E) Impact of L-Name (1mM), arginine (1mM), and combination of the two on NO concentration assessed using Daf-FM (15µM in PBS, 30 min at 37°C) in fresh Huh7 cells (C) treated with Wortmannin 1µM for one hour, (D) CRISPR control and KO CypD CRISPR (clone F1 used in figure 7 of this article), and (E) adCherry (as adGFP would interfere with Daf-FM signal) and adFate-1 transfected cells.

£ and #,  $p < 0.05$  vs. control; \*\*\*,  $p < 0.05$  vs. respective uncoupled state.

**A****Primary rats hepatocyte cells**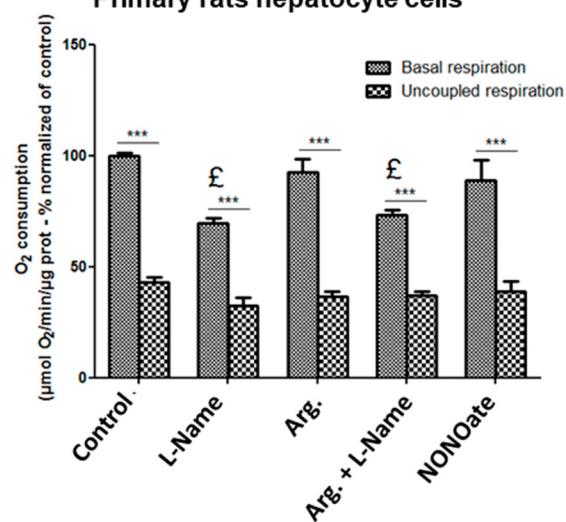**B**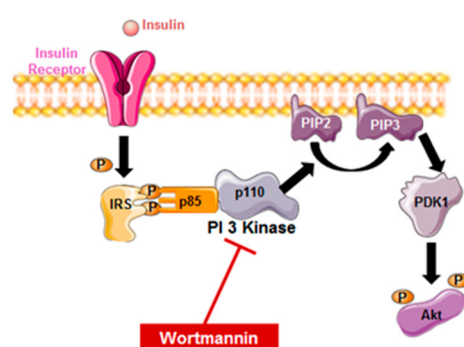**C****Huh7 treated with Wortmannin**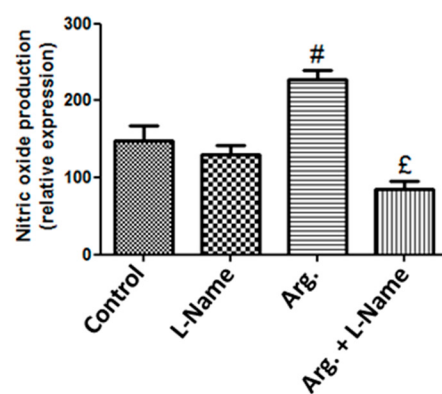**D**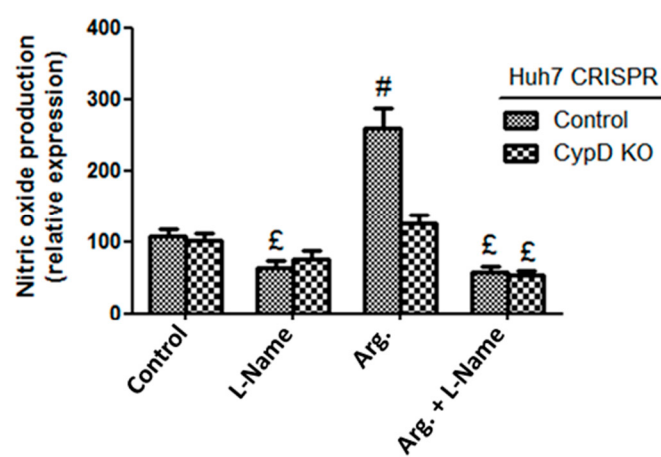**E**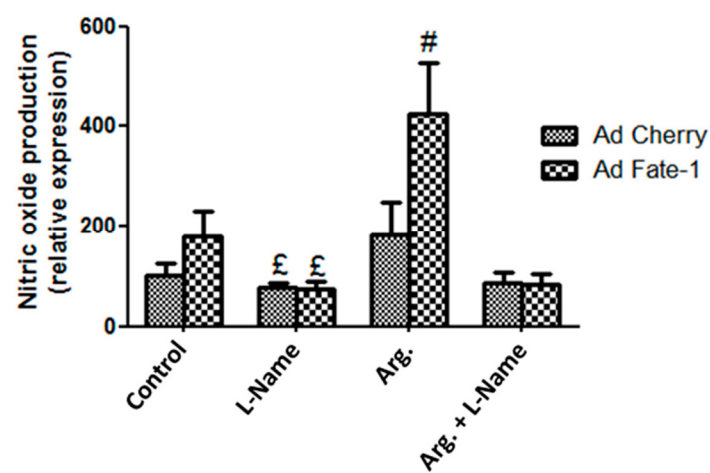

**Figure S6: CypD downregulation blunts NO impact on VDAC1/IP3R1 interaction.**

(A) Representative Western blots (at top) and quantitative analysis (below) of CypD level protein expression on Huh7 cells Control and CypD KO in three different clone using the CRISPR-cas9 technical (the clone F1 corresponding of the Huh7 CypD KO clone use for the figure 7 of this article).

(B) Impact of modulating NO concentration using L-Name (1mM), arginine (1mM) and Nonoate (1mM) in Huh7 cells control or KO CypD CRISPR-cas9 (clone E2 is an another clone of KO cells different from the one used in figure 7 of this article) on ER-mitochondria interactions assessed through VDAC1/IP3R1 interactions using *in situ* proximity ligation assay (PLA).

(C) Impact of NO substrate (arginine, 1mM) or donor (Nonoate, 1mM) on Huh7 cells transfected with siRNA control (in black) or CypD (in grey) on ER-mitochondria interactions assessed through VDAC1/IP3R1 interactions using *in situ* PLA.

For *in situ* PLA, representative image (at top) and quantitative analysis of VDAC1/IP3R1 interactions (below) ( $n = 10$  images minimum per experiment, 3 independent series per treatment, scale bar 15 $\mu$ m, x40 or x100).

For siRNA transfection, cells were transfected with CypD siRNA (25nmol/L) using the transfection reagent HiPerFect following the technical recommendations (Qiagen). Medium was changed 24h after transfection and experimentations were performed 48h later. £ and #,  $p < 0.05$  vs. control; \*\*\*,  $p < 0.05$  vs. respective treated control.

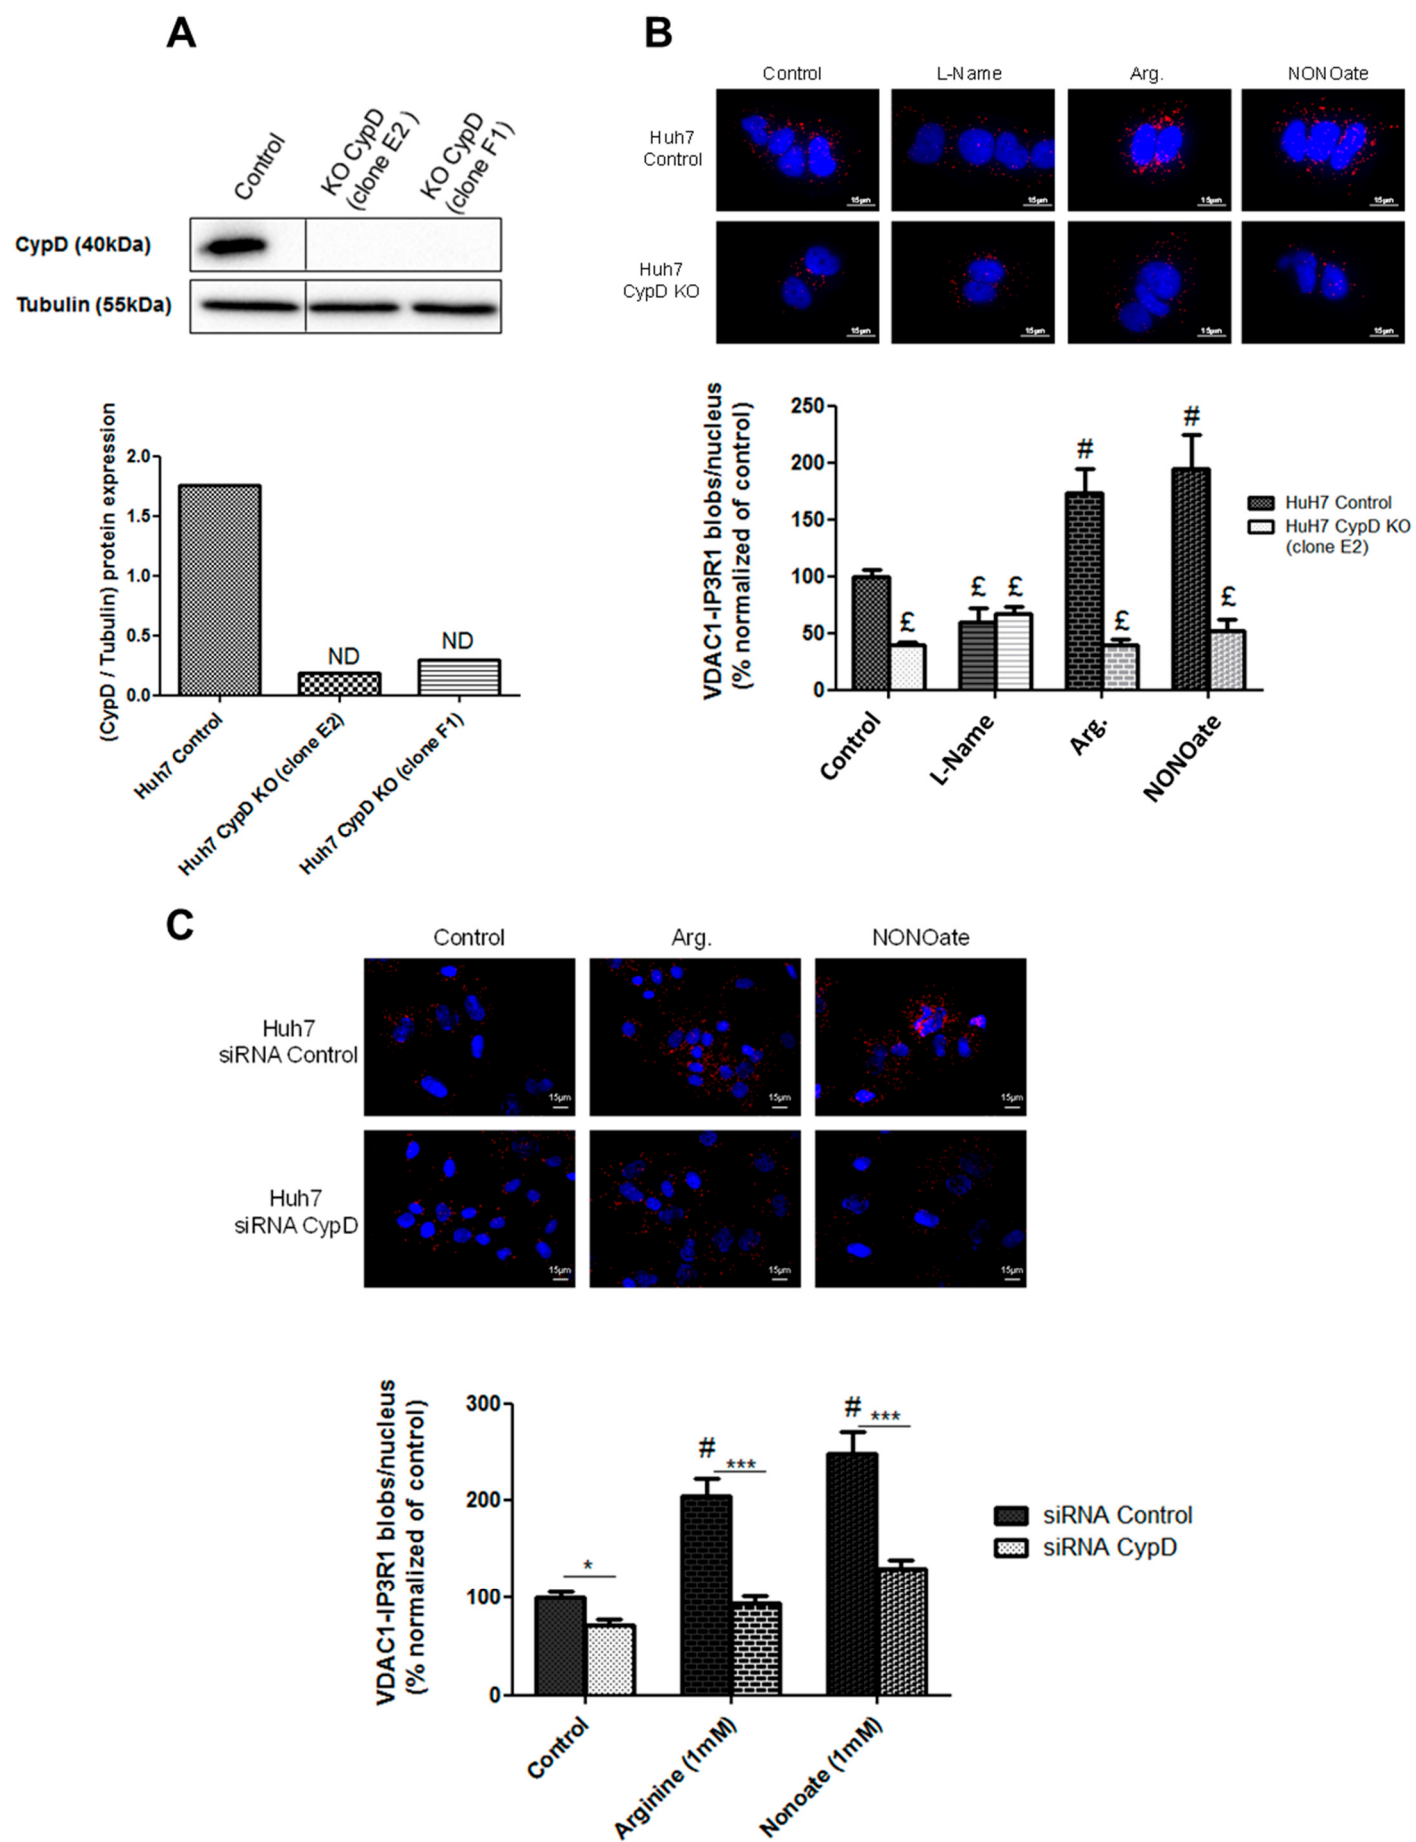

**Figure S7:** Enlarged representative images presented in Figure 1 to 7. Original figure number is mentioned in title.

**A- Fig. 3C**

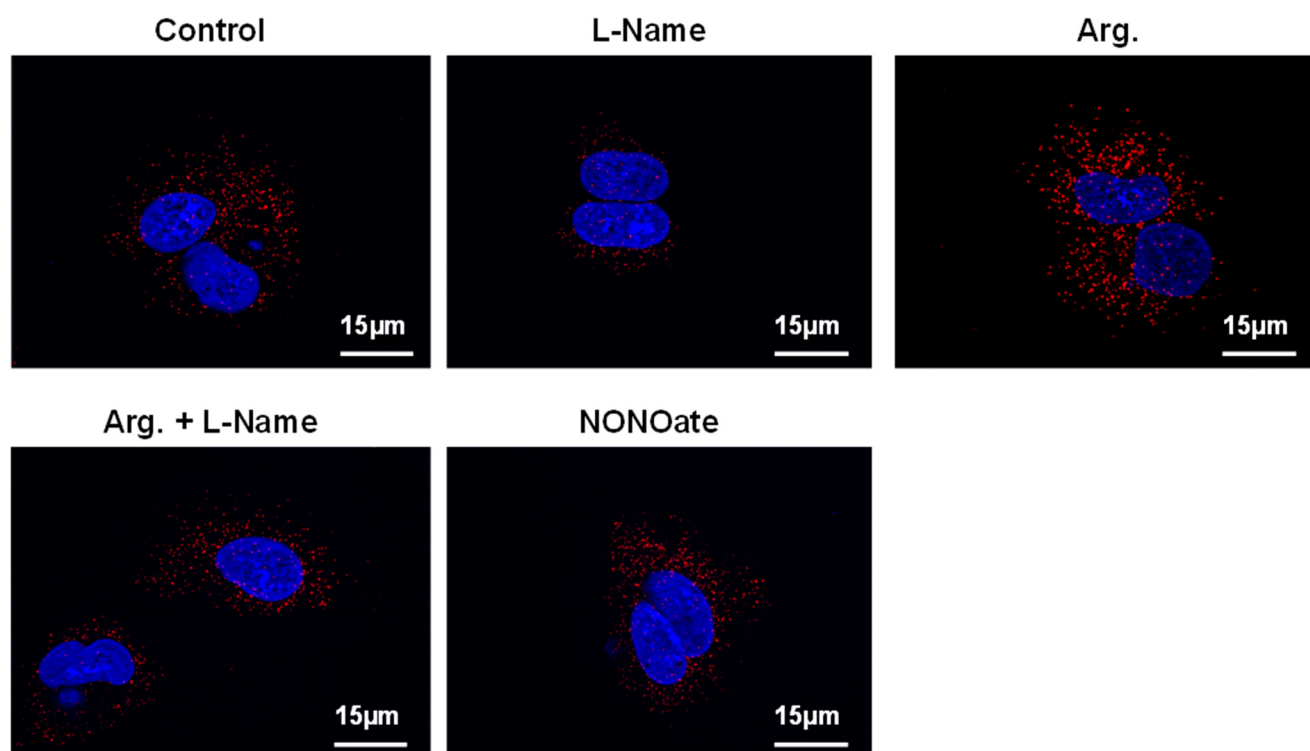

**B- Fig. 3D**

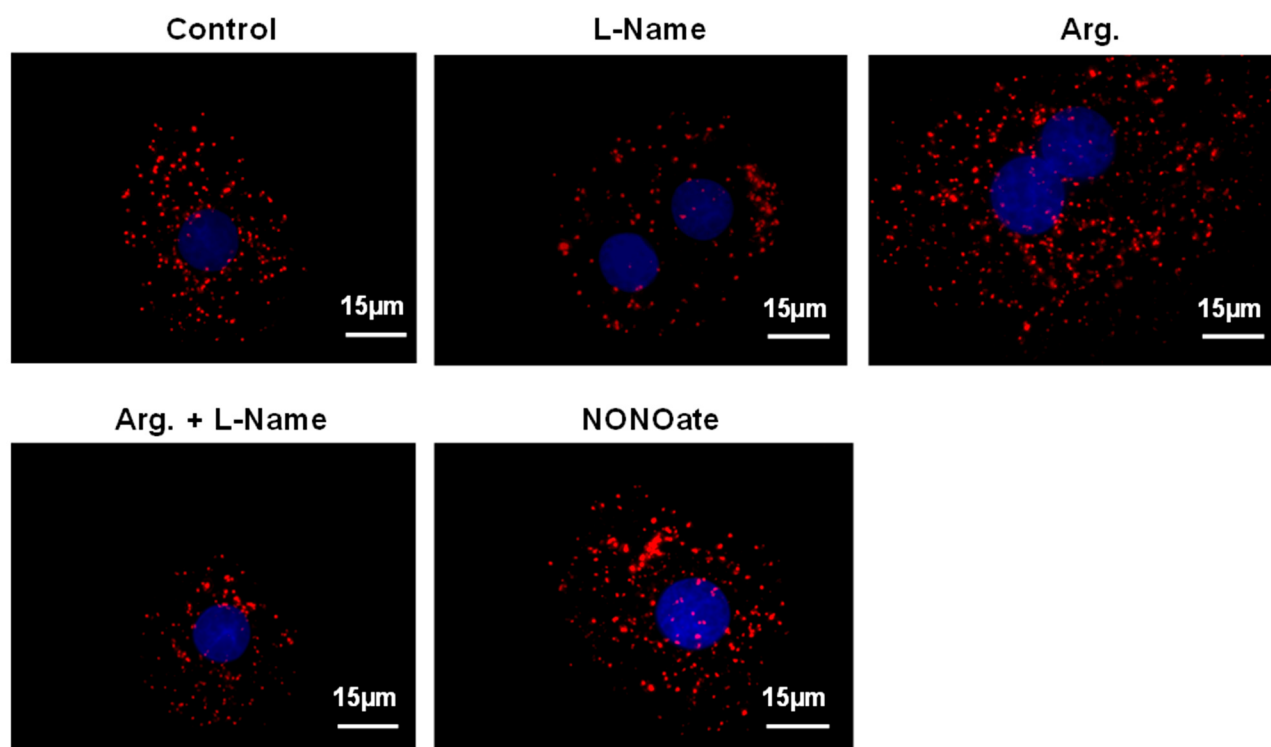

C- Fig. 3E

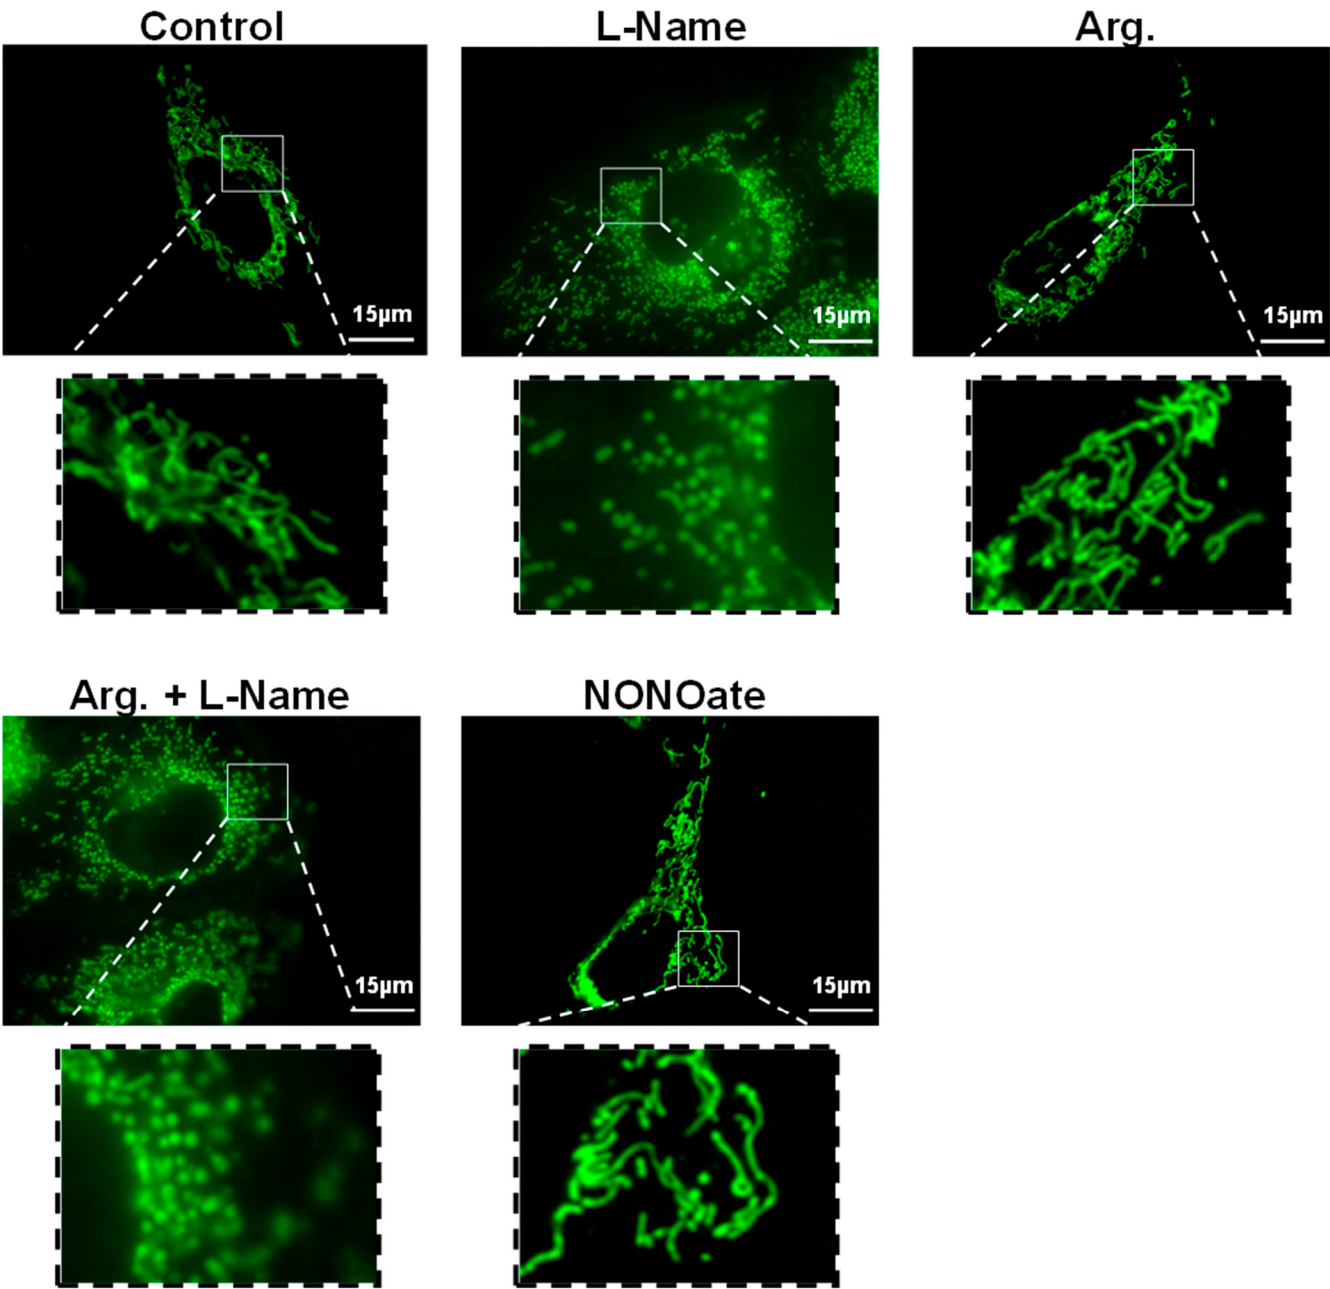

D- Fig. 4C

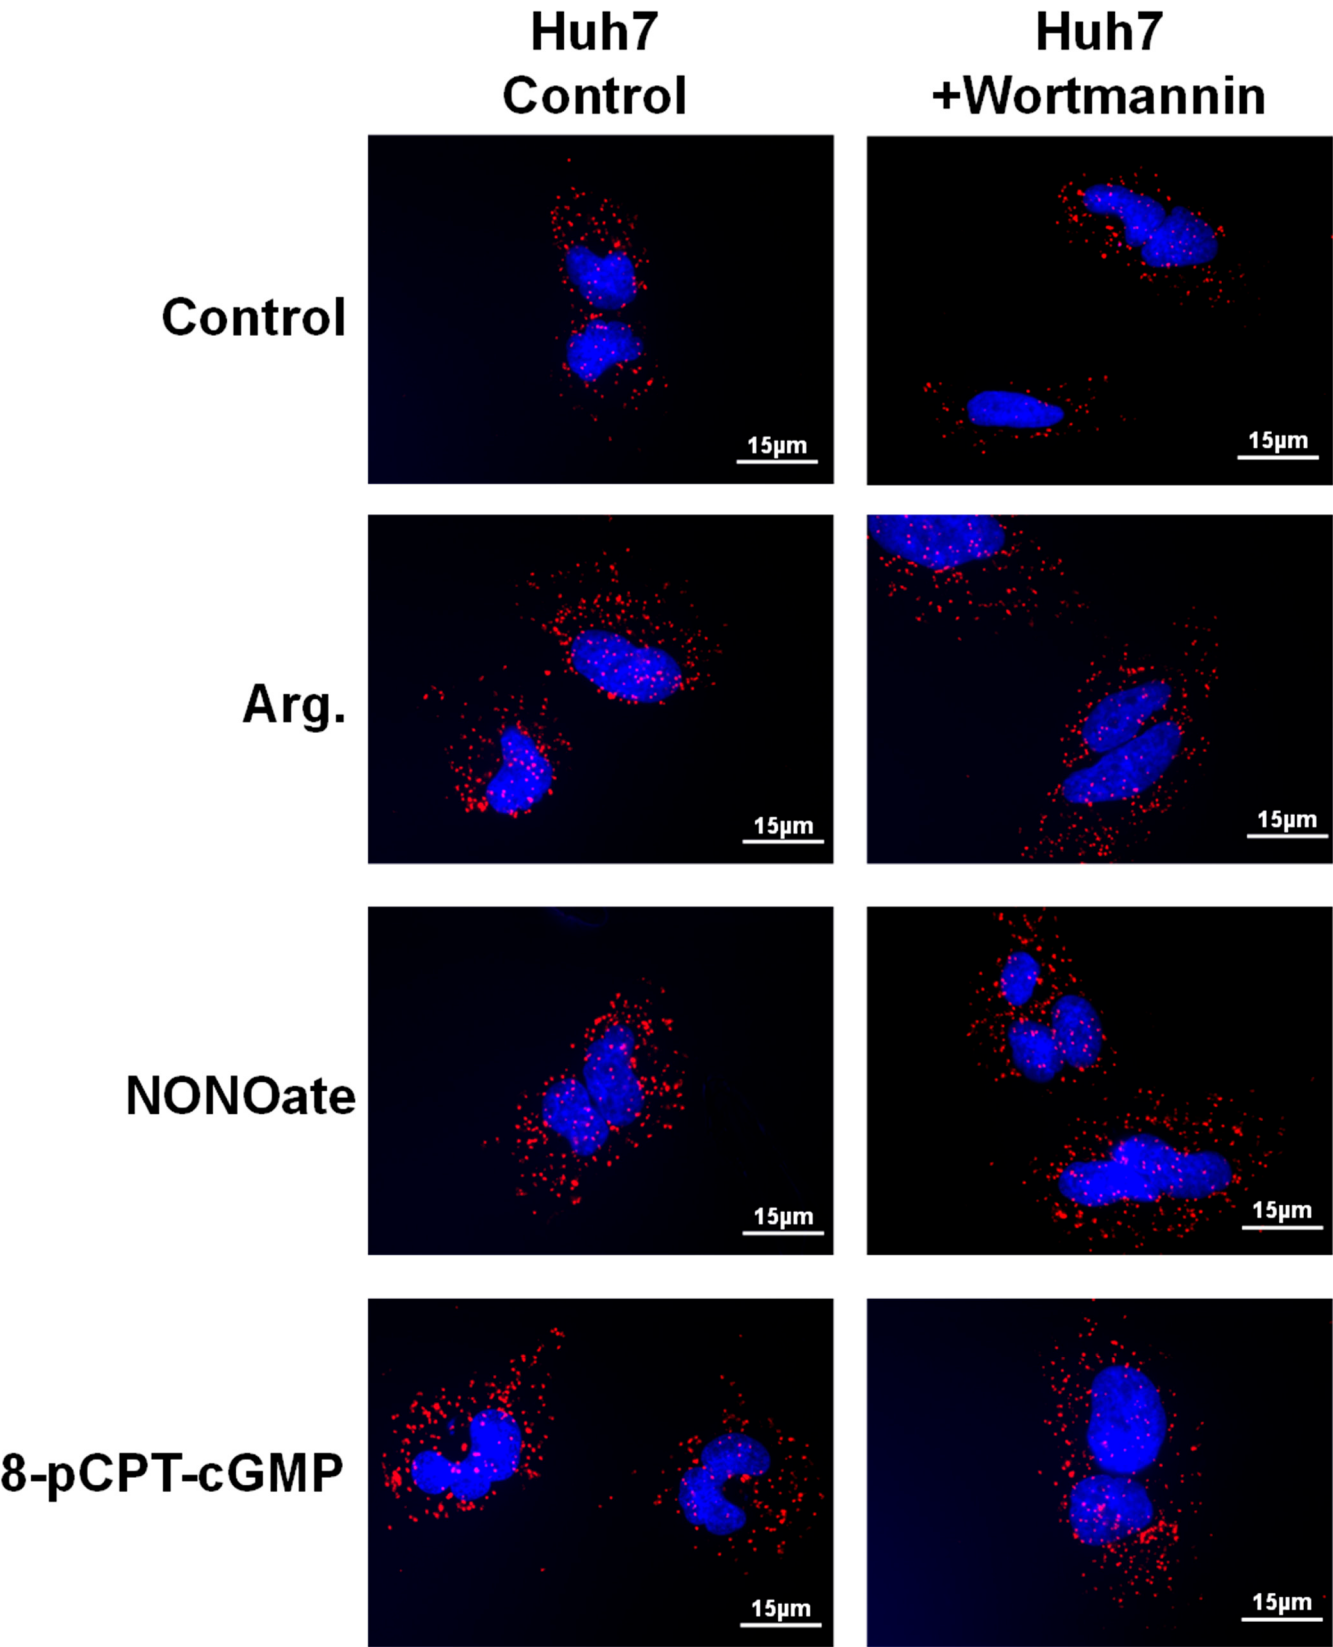

E- Fig. 5B

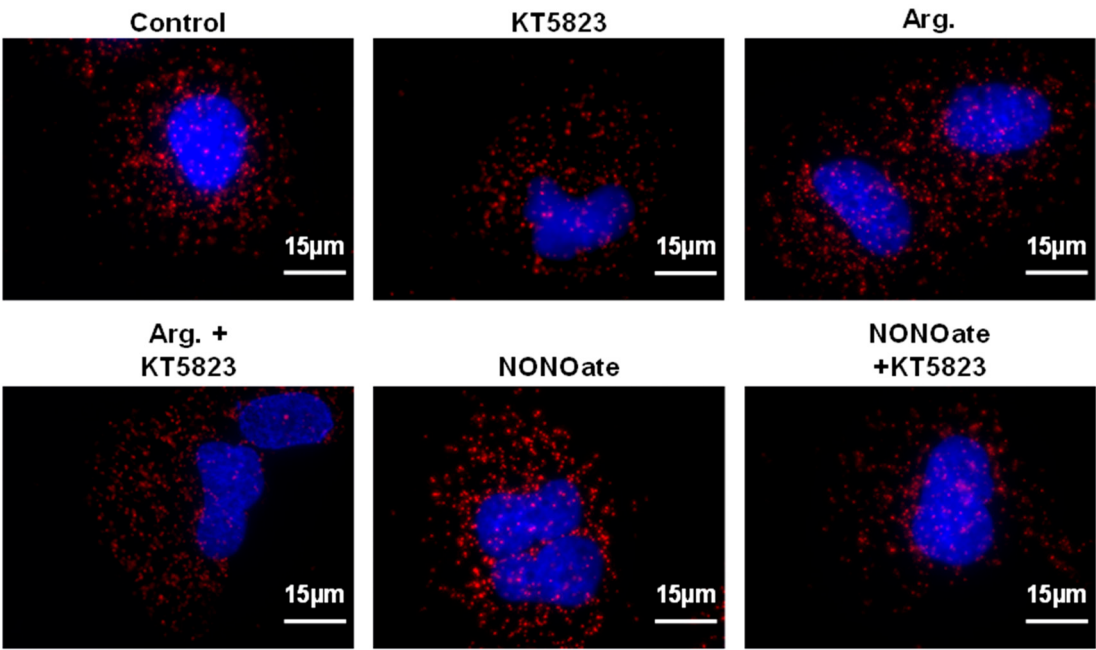

F- Fig. 5C

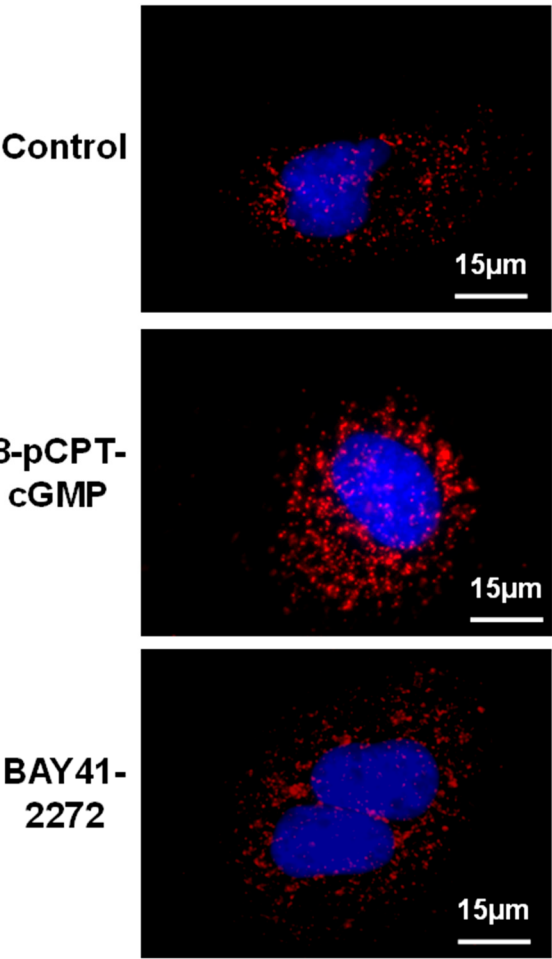

G- Fig. 5D

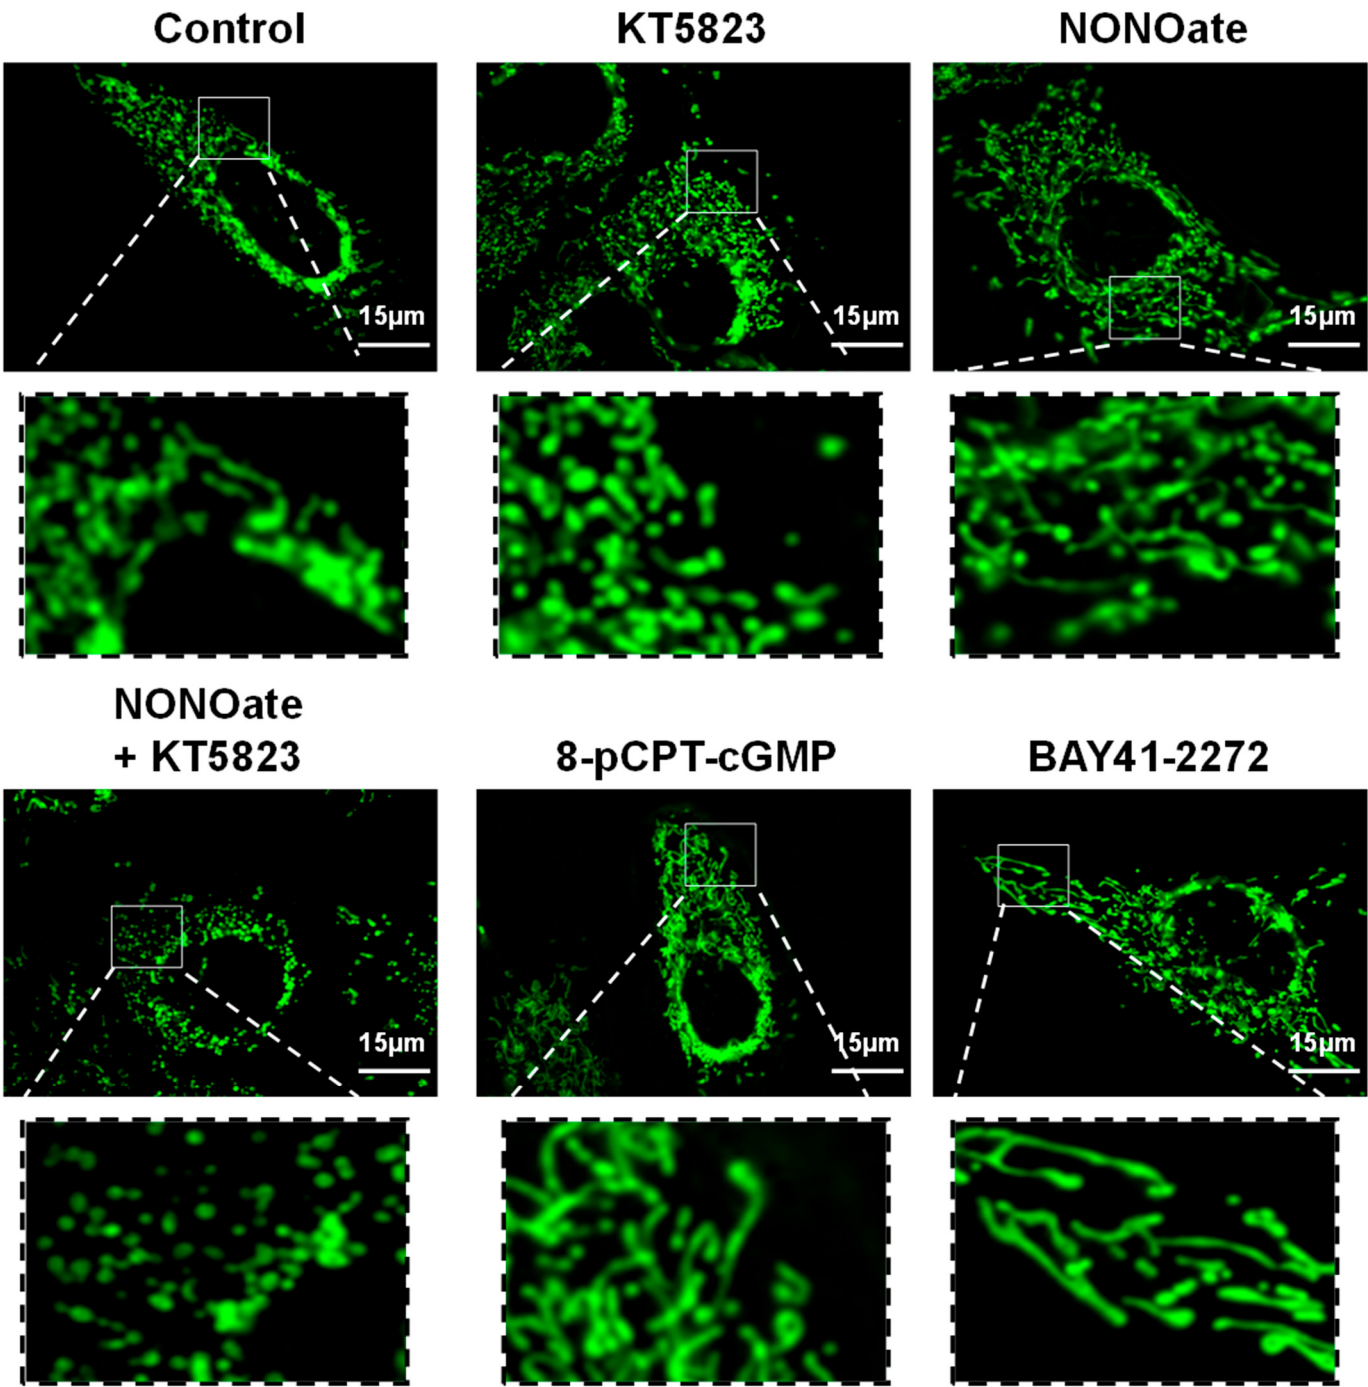

H- Fig. 7A

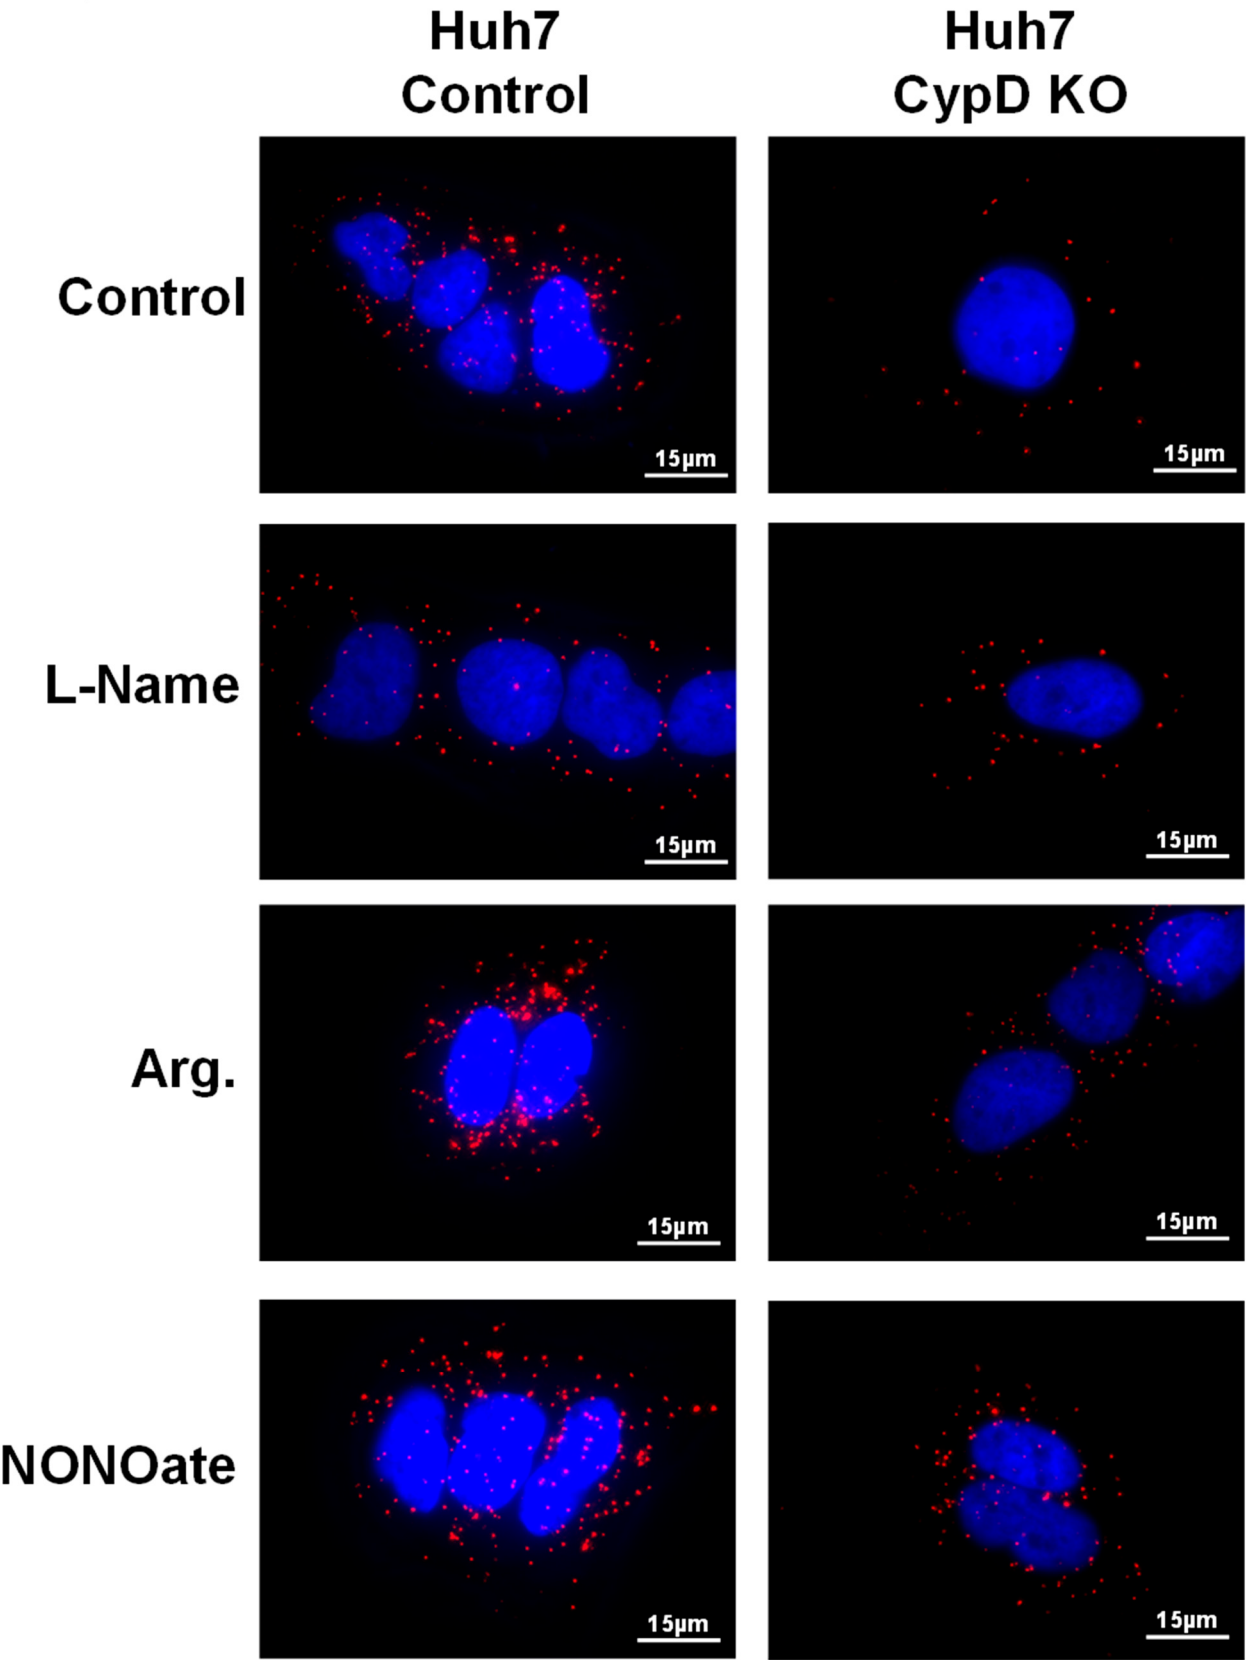

I- Fig. 7B

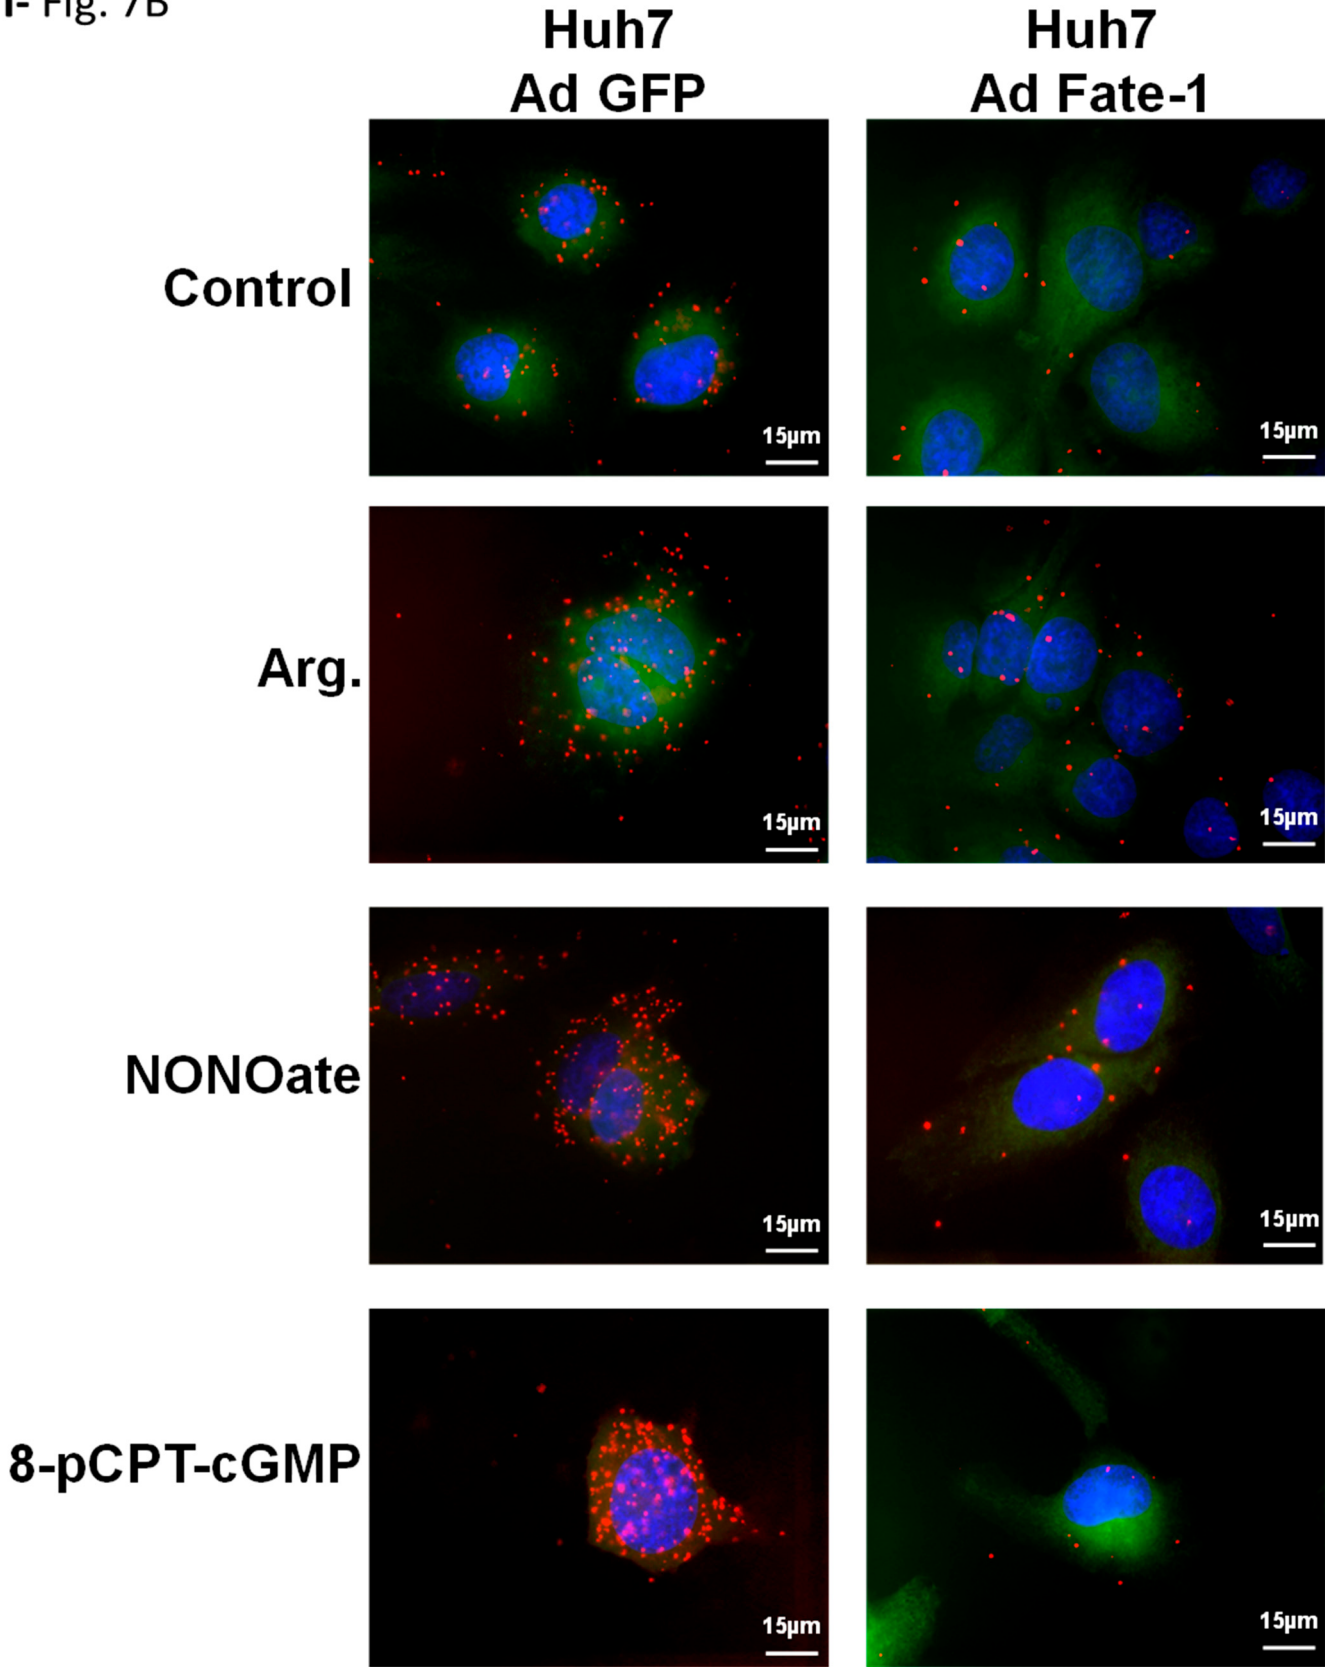

Supplement: Supplementary file 1 [file cells-08-01319-s001.pdf]
